# Supplementary material for: Cell migration leads to spatially distinct but clonally related airway cancer precursors
Source: HighWire-hosted journal article supplement (doi:10.1136/thoraxjnl-2013-204198), 2014-02-18
Supplement: thoraxjnl-2013-204198supp.pdf [file thoraxjnl-2013-204198supp.pdf]

## Supplements

### **Cell migration leads to spatially distinct but clonally related airway cancer precursors**

Christodoulos P Pipinikas<sup>1</sup>, Theodoros S Kiropoulos<sup>1, 2</sup>, Vitor H Teixeira<sup>1</sup>, James M Brown<sup>1</sup>, Aikaterini Varanou<sup>1</sup>, Mary Falzon<sup>3</sup>, Arrigo Capitanio<sup>3</sup>, Steven E Bottoms<sup>1</sup>, Bernadette Carroll<sup>4</sup>, Neal Navani<sup>1, 4</sup>, Frank McCaughan<sup>5, 6</sup>, Jeremy P George<sup>4</sup>, Adam Giangreco<sup>1</sup>, Nicholas A Wright<sup>7, 8</sup>, Stuart A C McDonald<sup>7, 8</sup>, Trevor A Graham<sup>7, 9</sup>, Sam M Janes<sup>1, \*</sup>

**Table S1. Primer Details**

| Gene                | Exon | <sup>A</sup> Primer | First Round                | Product size (bp) | Second Round            | Product size (bp) |
|---------------------|------|---------------------|----------------------------|-------------------|-------------------------|-------------------|
| <i>TP53</i>         | 5    | F                   | CACTTGTGCCCTGACTTTCA       | 307               | TCTGTCTCCTTCCTCTTCCTACA | 245               |
|                     |      | R                   | GAGCAATCAGTGAGGAATCAGA     |                   | AACCAGCCCTGTCGTCTCT     |                   |
|                     | 6    | F                   | AGAGACGACAGGGCTGGTT        | 237               | CAGGCCTCTGATTCCTCACT    | 182               |
|                     |      | R                   | TGGAGGGCCACTGACAAC         |                   | CTTAACCCCTCCTCCCAGAG    |                   |
|                     | 7    | F                   | TGCTTGCCACAGGTCTCC         | 236               | CTTGGGCCTGTGTTATCTCC    | 161               |
|                     |      | R                   | GGTCAGAGGCAAGCAGAGG        |                   | GTGTGCAGGGTGGCAAGT      |                   |
|                     | 8    | F                   | TTTTTAAATGGGACAGGTAGGA     | 258               | GCCTCTTGCTTCTCTTTTCC    | 191               |
|                     |      | R                   | CACCCTTGGTCTCCTCCAC        |                   | GCTTCTTGTCTGCTTGCTT     |                   |
| <i>CDKN2A (p16)</i> | 2A   | F                   | GCTTCCTTTCCGTCATGC         | 300               | CCTGGCTCTGACCATTCTGT    | 245               |
|                     |      | R                   | CAGGTACCGTGCGACATC         |                   | CAGCTCCTCAGCCAGGTC      |                   |
|                     | 2B   | F                   | CTGTTCTCTCTGGCAGGTCA       | 394               | CTTCCTGGACACGCTGGT      | 234               |
|                     |      | R                   | TGTGCTGGAAAATGAATGCT       |                   | TGGAAGCTCTCAGGGTACAAA   |                   |
| <i>K-RAS</i>        | -    | F                   | GAGTTTGTATTAAGGTAAGTGGTGGG | 272               | TTTGATAGTGTATTAACCTTAT  | 210               |
|                     |      | R                   | ATCAAAGAATGGTCCTGCAC       |                   | TATTAACAAGATTTACCTC     |                   |

<sup>A</sup> Dried desalted primers were from Sigma-Aldrich (Dorset, UK)

**Table S2. PCR Amplification Reactions**

| <b>First Round PCR</b>               |                     |               |               |               |               |               |              |
|--------------------------------------|---------------------|---------------|---------------|---------------|---------------|---------------|--------------|
|                                      | <i>TP53-5</i>       | <i>TP53-6</i> | <i>TP53-7</i> | <i>TP53-8</i> | <i>p16-2A</i> | <i>p16-2B</i> | <i>K-RAS</i> |
|                                      | <sup>A</sup> 1/5/55 | 2/5/60        | 1/5/60        | 2/5/60        | 2/5/60        | 2/5/60        | 2/5/60       |
| <b>Template</b>                      | 2.00                | 2.00          | 2.00          | 2.00          | 2.00          | 2.00          | 2.00         |
| <sup>B</sup> <b>Buffer</b>           | 2.50                | 2.50          | 2.50          | 2.50          | 2.50          | 2.50          | 2.50         |
| <sup>C</sup> <b>MgCl<sub>2</sub></b> | 1.00                | 2.00          | 1.00          | 2.00          | 2.00          | 2.00          | 2.00         |
| <sup>D</sup> <b>dNTP Mix</b>         | 0.50                | 0.50          | 0.50          | 0.50          | 0.50          | 0.50          | 0.50         |
| <b>Q-solution</b>                    | 5.00                | 5.00          | 5.00          | 5.00          | 5.00          | 5.00          | 5.00         |
| <sup>E</sup> <b>Forward primer</b>   | 0.25                | 0.25          | 0.25          | 0.25          | 0.25          | 0.25          | 0.25         |
| <b>Reverse primer</b>                | 0.25                | 0.25          | 0.25          | 0.25          | 0.25          | 0.25          | 0.25         |
| <b>Taq</b>                           | 0.20                | 0.20          | 0.20          | 0.20          | 0.20          | 0.20          | 0.20         |
| <b>H<sub>2</sub>O</b>                | 13.30               | 12.30         | 13.30         | 12.30         | 12.30         | 12.30         | 12.30        |
| <b>Second Round PCR</b>              |                     |               |               |               |               |               |              |
|                                      | 1/5/60              | 1/0/60        | 1/5/60        | 2/0/60        | 2/5/60        | 2/5/60        | 2/5/55       |
| <b>Template</b>                      | 2.00                | 2.00          | 2.00          | 2.00          | 2.00          | 2.00          | 2.00         |
| <b>Buffer</b>                        | 2.50                | 2.50          | 2.50          | 2.50          | 2.50          | 2.50          | 2.50         |
| <b>MgCl<sub>2</sub></b>              | 1.00                | 1.00          | 1.00          | 2.00          | 2.00          | 2.00          | 2.00         |
| <b>dNTP Mix (10mM)</b>               | 0.50                | 0.50          | 0.50          | 0.50          | 0.50          | 0.50          | 0.50         |
| <b>Q-solution</b>                    | 5.00                | 0.00          | 5.00          | 0.00          | 5.00          | 5.00          | 5.00         |
| <b>Forward primer</b>                | 0.25                | 0.25          | 0.25          | 0.25          | 0.25          | 0.25          | 0.25         |
| <b>Reverse primer</b>                | 0.25                | 0.25          | 0.25          | 0.25          | 0.25          | 0.25          | 0.25         |
| <b>Taq</b>                           | 0.20                | 0.20          | 0.20          | 0.20          | 0.20          | 0.20          | 0.20         |
| <b>H<sub>2</sub>O</b>                | 13.30               | 18.30         | 13.30         | 17.30         | 12.30         | 12.30         | 12.30        |

<sup>A</sup> Numbers refer to volume of MgCl<sub>2</sub> and Q-solution in the reaction and PCR annealing temperature (°C), respectively

<sup>B</sup> Promega 10x reaction buffer without MgCl<sub>2</sub> used at the supplied concentration (Southampton, UK)

<sup>C</sup> MgCl<sub>2</sub>, Q-solution and Taq DNA polymerase are all from Qiagen (Crawley, UK)

<sup>D</sup> dNTP mix working concentration was 10mM (Invitrogen, Paisley, UK)

<sup>E</sup> Primer working concentration was 20µM

| <b>Table S3. Microsatellite primer details for multiplex <i>LoH</i> analysis</b> |          |                              |                            |                                                                                                                                                                            |
|----------------------------------------------------------------------------------|----------|------------------------------|----------------------------|----------------------------------------------------------------------------------------------------------------------------------------------------------------------------|
| <sup>A</sup> Marker                                                              | Location | Sequence (5'-3')             | Expected product size (bp) | Reaction Conditions                                                                                                                                                        |
| D17S 1678 (F)                                                                    | 17p      | [6FAM] TTTGGGTCTTTGAACCCTTG  | 120                        | <sup>B</sup> Multiplex PCR Mix: 25µl<br>10x Primer Mix (2µM each primer): 5µl<br>RNase Free-H <sub>2</sub> O: 18µl<br>Template DNA: 2µl<br><br>Annealing Temperature: 57°C |
| D17S 1678 (R)                                                                    |          | CCACAACAAAACACCAGTGC         |                            |                                                                                                                                                                            |
| D17S 1506 (F)                                                                    | 17q      | [HEX] TGTGGGATGGGGTGAGATTTTC | 150                        |                                                                                                                                                                            |
| D17S 1506 (R)                                                                    |          | CTGTTGGTCGGTGGGTTG           |                            |                                                                                                                                                                            |
| D17S 1881 (F)                                                                    | 17p      | [6FAM] CCCAGTTTAAGGAGTTTGGC  | 210                        |                                                                                                                                                                            |
| D17S 1881 (R)                                                                    |          | TAGGGCAGTCAGCCTTGTG          |                            |                                                                                                                                                                            |

<sup>A</sup> Primers were HPLC purified and were reconstituted in TE buffer at a final stock concentration of 100µM.

<sup>B</sup> For each microsatellite marker, 10µl of the 100µM stock were mixed together and the volume was adjusted to 500µl using distilled H<sub>2</sub>O. The final concentration of each primer in the working primer mix was 2µM. The final concentration of each primer used in the amplification reaction was 0.2µM.
